# Supplementary material for: Improving accuracy of cell and chromophore concentration measurements using optical density
Source: PubMed Central journal article supplement (PMC3663833; doi:10.1186/2046-1682-6-4), 2013-04-22
Supplement: 2046-1682-6-4-S2.pdf [file 2046-1682-6-4-S2.pdf]

## Supplemental File: Figure S2

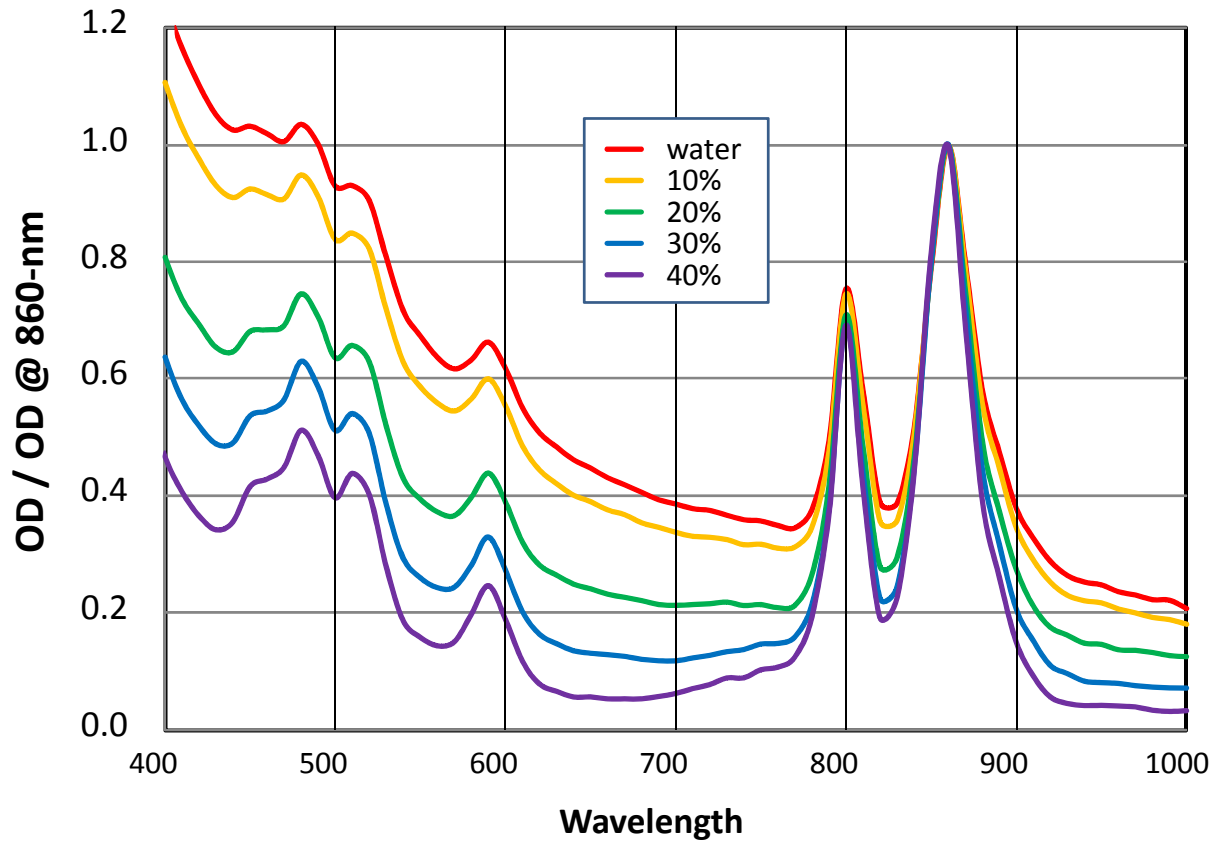

### Additional file 2. Figure S2 – Scattering Reduction in Rhodobacter.

Reduction of the scattering component of the 'absorption spectrum' of *Rhodobacter capsulatus* by resuspension in increasing levels of bovine serum albumin (BSA). *R. sphaeroides* was grown on YCC media under anaerobic photo-heterotrophic conditions which results in the induction of the light-harvesting proteins, with LH-2 being dominant (absorption peaks of 800-nm and 855-nm (Klug & Cohen, 1988). The light attenuation spectra were normalized at 860-nm.
