# Supplementary material for: Improving accuracy of cell and chromophore concentration measurements using optical density
Source: PubMed Central journal article supplement (PMC3663833; doi:10.1186/2046-1682-6-4), 2013-04-22
Supplement: 2046-1682-6-4-S4.pdf [file 2046-1682-6-4-S4.pdf]

## Supplemental File: Figure S4

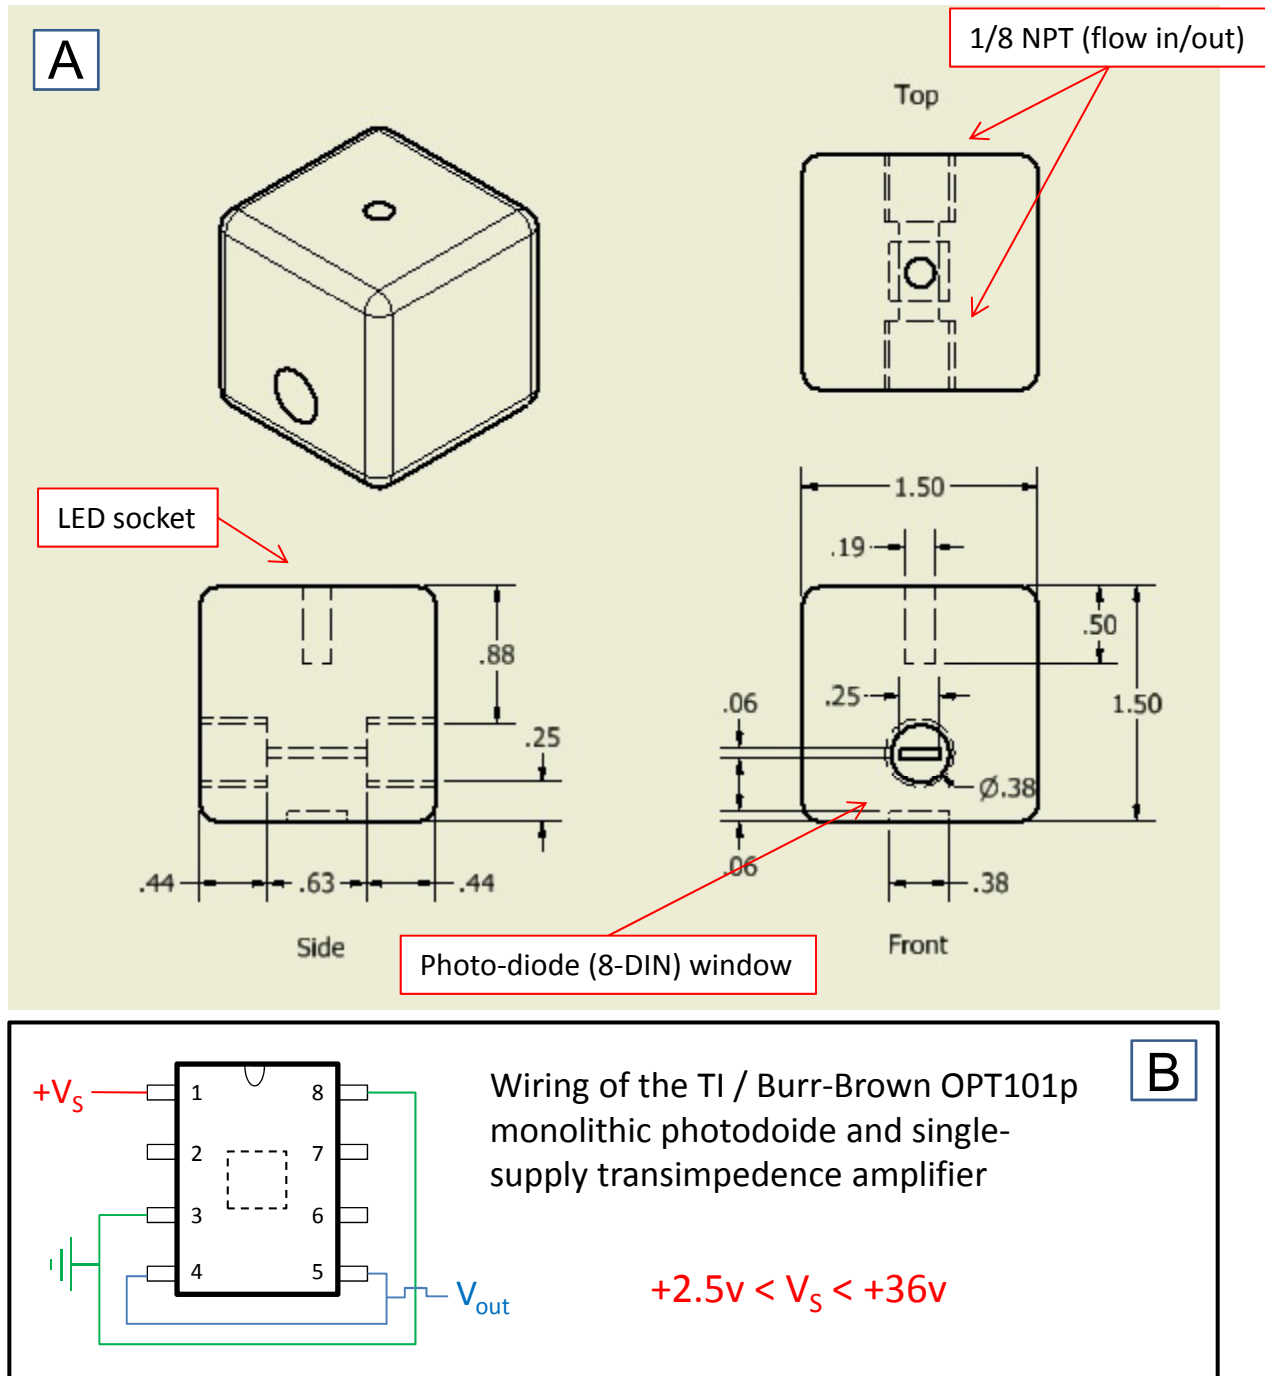

### Additional file 4. Figure S4 – OD flow cell schematics.

Fabrication details for the OD flow cell including: **A**) Schematic and mechanical drawing of the prototype acrylic flow cell which includes an LED insert and photodiode, and **B**) The photodiode used in this work showing the basic wiring arrangement to measure the output voltage which responds to the light intensity reaching the 2.29 x 2.29 mm photosensitive 'window' of the integrated circuit.
