# Supplementary material for: Improving accuracy of cell and chromophore concentration measurements using optical density
Source: PubMed Central journal article supplement (PMC3663833; doi:10.1186/2046-1682-6-4), 2013-04-22
Supplement: 2046-1682-6-4-S5.pdf [file 2046-1682-6-4-S5.pdf]

## Supplemental File: Figure S5

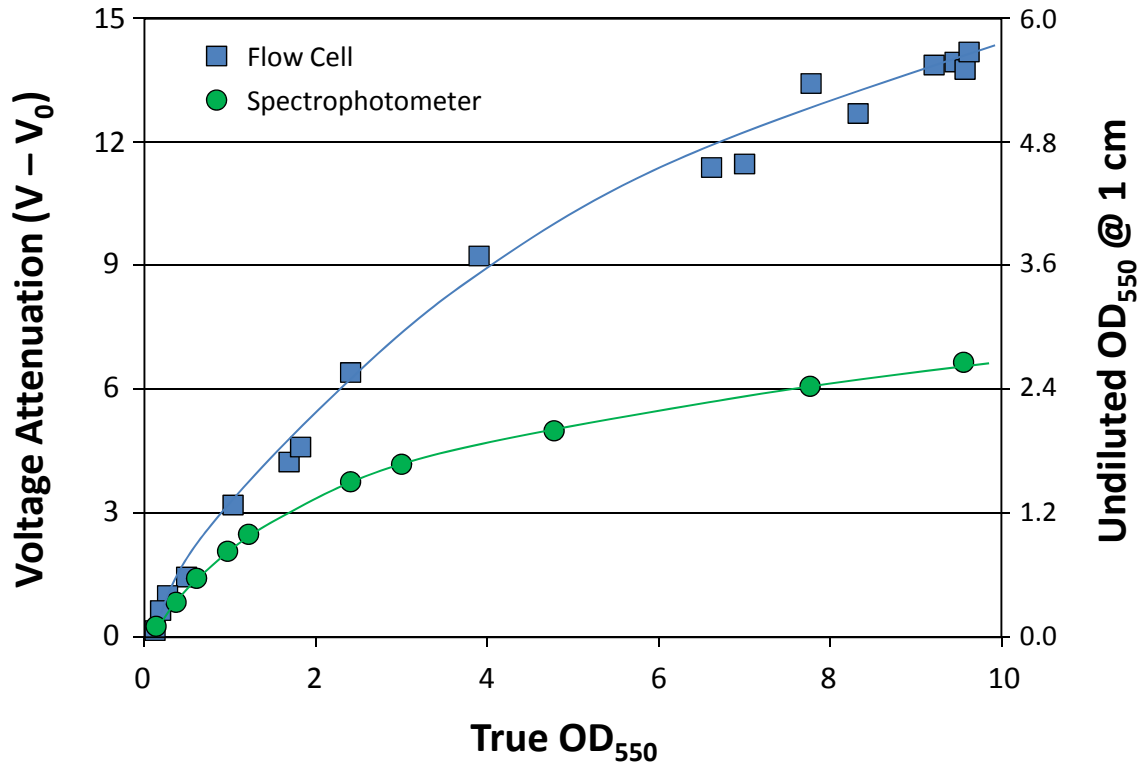

### Additional file 5. Figure S5 – Algae OD measurements in OD flow cell.

Ability of a short path-length flow cell to extend the range of OD measurements. *Chlorella vulgaris* cultures grown photosynthetically were resuspended at various cell concentrations and run through the flow cell as compared to undiluted OD<sub>550</sub> measurements (Spectramax photometer).
